# Supplementary material for: Integrated Microfluidic Preconcentration and Nucleic Amplification System for Detection of Influenza A Virus H1N1 in Saliva
Source: PubMed Central journal article supplement (PMC7074655; doi:10.3390/mi11020203), 2020-02-16
Supplement: micromachines-11-00203-s001.pdf [file micromachines-11-00203-s001.pdf]

# Supplementary Materials: Integrated Microfluidic Preconcentration and Nucleic Amplification System for Detection of Influenza a Virus H1N1 in Saliva

Yonghee Kim, Abdurhaman Teyib Abafogi, Buu Minh Tran, Jaewon Kim, Jinyeop Lee, Zhenzhong Chen, Pan Kee Bae, Kyoungsook Park, Yong-Beom Shin, Danny van Noort, Nae Yoon Lee and Sungsu Park

Table 1. Material properties used in numerical analysis.

| Materials         | Molar Mass (g/mol) | Density (kg/m <sup>3</sup> ) | Specific Heat Capacity (J/kg·K) | Thermal Conductivity (W/m·K) |
|-------------------|--------------------|------------------------------|---------------------------------|------------------------------|
| Air               | 28.96              | 1.275                        | $1.0044 \times 10^3$            | $2.61 \times 10^{-2}$        |
| PCR fluid (Water) | 10.82              | 997                          | 4181.7                          | 0.6069                       |
| PDMS (10:1)       | 1250               | 980                          | 1100                            | 0.18                         |
| Mineral oil       | 480                | 850                          | 1670                            | 0.14                         |

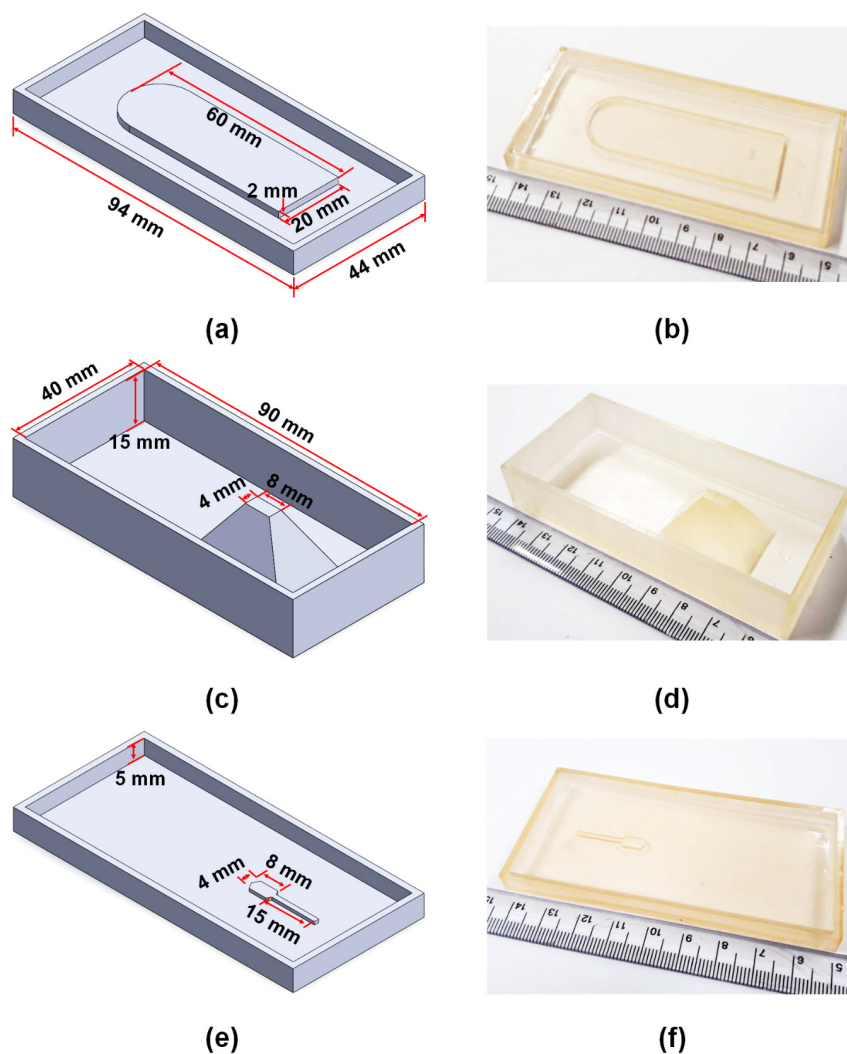

Figure S1. The 3D design (a, c, e) and their respective photographic images (b, d, f) of the master moulds for each layer: the lid (a, b), concentration (c, d), and PCR (e, f) layers.

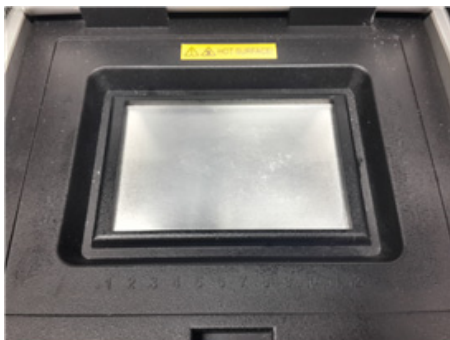

**Figure S2.** A tailor-made flat heat block was used to conduct chip-based PCR, instead of using conventional heat block which contains either 48 or 96 wells to hold PCR tubes,
